# Supplementary material for: Reperfusion Activates AP-1 and Heat Shock Response in Donor Kidney Parenchyma after Warm Ischemia
Source: Hindawi journal article supplement (doi:10.1155/2018/5717913), 2018-08-16
Supplement: f1 [file 5717913.f1.zip]

Archive with 4 entries (3 files):
- 5717913.f1/
- 5717913.f1/5717913.f1.xlsx
- 5717913.f1/5717913.f2.xlsx
- 5717913.f1/5717913.f3.xlsx
