# Supplementary material for: Reperfusion Activates AP-1 and Heat Shock Response in Donor Kidney Parenchyma after Warm Ischemia
Source: Hindawi journal article supplement (doi:10.1155/2018/5717913), 2018-08-16
Supplement: f1 [file 5717913.f1.zip › 5717913.f1/5717913.f1.xlsx]

## Sheet: Sheet1
Number of reads: Match specificity
Match specificity (single)
Number of match positions
	Sample 1, before perfusion	Sample 1, after perfusion	Sample 2, before perfusion	Sample 2, after perfusion
0	1165534	1191401	1310422	1283340
1	5397889	5118204	5397992	5604738
2	765383	717356	743853	768621
3	511843	464851	474227	522406
4	76817	70792	71927	75813
5	51319	46636	51559	50223
6	20877	19588	20779	21129
7	15600	14386	15527	15581
8	12142	11095	11818	12140
9	9705	9077	9786	9889
10	6990	6377	6466	6914
Mapping statistics
Fragment counting
	Single	% of Total	Paired	% of Total	Total	% of Total Fragments	Sample 1, before perfussion
Counted fragments	6868565	100	0	0	6868565	85.49
- unique fragments	5397889	100	0	0	5397889	67.19
- non-specifically	1470676	100	0	0	1470676	18.31
Uncounted fragments	1165534	100	0	0	1165534	14.51
Total fragments	8034099	100	0	0	8034099	100
	Single	% of Total	Paired	% of Total	Total	% of Total Fragments	Sample 1, after perfussion
Counted fragments	6478362	100	0	0	6478362	84.47
- unique fragments	5118204	100	0	0	5118204	66.73
- non-specifically	1360158	100	0	0	1360158	17.73
Uncounted fragments	1191401	100	0	0	1191401	15.53
Total fragments	7669763	100	0	0	7669763	100
	Single	% of Total	Paired	% of Total	Total	% of Total Fragments	Sample 2, before perfussion
Counted fragments	6803934	100	0	0	6803934	83.85
- unique fragments	5397992	100	0	0	5397992	66.52
- non-specifically	1405942	100	0	0	1405942	17.33
Uncounted fragments	1310422	100	0	0	1310422	16.15
Total fragments	8114356	100	0	0	8114356	100
	Single	% of Total	Paired	% of Total	Total	% of Total Fragments	Sample 2, after perfussion
Counted fragments	7087454	100	0	0	7087454	84.67
- unique fragments	5604738	100	0	0	5604738	66.96
- non-specifically	1482716	100	0	0	1482716	17.71
Uncounted fragments	1283340	100	0	0	1283340	15.33
Total fragments	8370794	100	0	0	8370794	100
Default counting scheme ('Fragment counts'): A intact pair is counted as one, broken pairs are ignored
Reference Sequences
References	Length	Genes
25	3095693981	57773
Selected input sequences
Sequence reads
Name	Number of reads	Longest read	paired
Sample 1, before perfussion	8034099	50	no
Sample 1, after perfussion	7669763	50	no
Sample 2, before perfussion	8114356	50	no
Sample 2, after perfussion	8370794	50	no
