# Supplementary material for: Reperfusion Activates AP-1 and Heat Shock Response in Donor Kidney Parenchyma after Warm Ischemia
Source: Hindawi journal article supplement (doi:10.1155/2018/5717913), 2018-08-16
Supplement: f1 [file 5717913.f1.zip › 5717913.f1/5717913.f2.xlsx]

## Sheet: Sheet1
Gene information			Kidney 1			Kidney 2
gene_name	ENSEMBL	gene_biotype	Weighted proportions fold change	Expression before (RPKM)	Expression after (RPKM)	Weighted proportions fold change	Expression before (RPKM)	Expression after (RPKM)
AC002398.9	ENSG00000188223	protein_coding	2.44	0.33	0.8	2.51	0.22	0.54
AC002550.5	ENSG00000261312	antisense	1.95	0.6	1.16	1.82	0.31	0.56
AC011526.1	ENSG00000267107	lincRNA	2.62	0.17	0.43	2.56	0.11	0.29
AC013394.2	ENSG00000272888	processed_transcript	1.81	1.01	1.83	1.55	1.18	1.83
ADAMTS4	ENSG00000158859	protein_coding	2.26	0.8	1.81	5.92	0.12	0.71
ADM	ENSG00000148926	protein_coding	4.01	16.5	66.16	2.11	8.98	18.9
AKAP12	ENSG00000131016	protein_coding	1.97	1.56	3.08	3.81	0.79	3
ANKRD37	ENSG00000186352	protein_coding	2.37	0.82	1.94	2.77	0.54	1.5
AP000769.1	ENSG00000173727	protein_coding	2.16	0.72	1.56	2.09	0.6	1.25
APOLD1	ENSG00000178878	protein_coding	1.93	0.43	0.82	4.85	0.25	1.23
ARID3A	ENSG00000116017	protein_coding	2.13	1.34	2.85	1.66	1.32	2.2
ATF3	ENSG00000162772	protein_coding	2.3	0.7	1.61	7.29	0.1	0.72
BHLHE40	ENSG00000134107	protein_coding	2.65	25.26	66.86	3.88	8.95	34.73
BNIP1	ENSG00000113734	protein_coding	1.51	0.33	0.5	1.54	0.29	0.45
BTG2	ENSG00000159388	protein_coding	2.45	22.8	55.78	4.91	4.9	24.05
BX470102.3	ENSG00000238279	antisense	2.39	1.92	4.59	∞	0	0.56
C11orf96	ENSG00000187479	protein_coding	1.94	0.67	1.29	2.77	0.32	0.9
C15orf57	ENSG00000128891	protein_coding	1.6	0.17	0.28	1.71	0.21	0.35
C18orf42	ENSG00000231824	protein_coding	7.42	0.00279	0.02	6.72	0.00281	0.02
C19orf35	ENSG00000188305	protein_coding	1.81	0.46	0.84	1.57	0.58	0.92
C1orf132	ENSG00000203709	processed_transcript	1.69	0.61	1.03	1.93	0.62	1.19
C4orf47	ENSG00000205129	protein_coding	2	0.1	0.21	1.57	0.19	0.29
CASZ1	ENSG00000130940	protein_coding	1.9	0.57	1.08	1.66	0.4	0.67
CCR7	ENSG00000126353	protein_coding	8.48	0.01	0.11	∞	0	0.05
CD83	ENSG00000112149	protein_coding	1.53	0.38	0.58	1.58	0.34	0.54
CDKN1A	ENSG00000124762	protein_coding	1.55	5.97	9.22	2.85	1.55	4.42
CKS2	ENSG00000123975	protein_coding	1.91	0.4	0.76	2.45	0.24	0.59
CPN2	ENSG00000178772	protein_coding	1.51	0.63	0.95	1.56	0.41	0.63
CRISPLD2	ENSG00000103196	protein_coding	1.67	0.95	1.58	3.33	0.37	1.24
CTD-2636A23.2	ENSG00000261604	antisense	3.18	0.36	1.14	2.03	0.82	1.66
CTD-3064M3.3	ENSG00000261655	sense_overlapping	∞	0	0.31	6.72	0.07	0.5
CYP4F2	ENSG00000186115	protein_coding	1.64	0.22	0.37	1.71	0.23	0.4
DDIT3	ENSG00000175197	protein_coding	6.62	5.19	34.33	5.85	4.75	27.79
DDIT4	ENSG00000168209	protein_coding	1.79	71.59	128.26	3.22	13.82	44.52
DEFB1	ENSG00000164825	protein_coding	1.56	0.66	1.04	1.57	2.84	4.47
DNAJB1	ENSG00000132002	protein_coding	1.91	3.31	6.32	3.06	2	6.11
DNAJC12	ENSG00000108176	protein_coding	2.12	0.04	0.08	1.77	0.07	0.12
EGR1	ENSG00000120738	protein_coding	2.53	47.49	120.27	23.02	2.23	51.3
EIF2AK3	ENSG00000172071	protein_coding	1.77	0.6	1.06	3.09	0.32	0.98
ELF5	ENSG00000135374	protein_coding	1.94	0.1	0.19	1.65	0.13	0.22
EPHA8	ENSG00000070886	protein_coding	10.6	0.00364	0.04	∞	0	0.01
F2RL3	ENSG00000127533	protein_coding	1.85	2.25	4.16	4.63	0.67	3.09
FA2H	ENSG00000103089	protein_coding	1.59	0.5	0.79	1.82	0.29	0.52
FAM110D	ENSG00000197245	protein_coding	1.83	1.45	2.65	2.02	0.81	1.64
FAM224B	ENSG00000230663	lincRNA	∞	0	0.05	3.84	0.02	0.06
FAM53B	ENSG00000189319	protein_coding	1.92	0.02	0.04	2.43	0.02	0.05
FDFT1	ENSG00000079459	protein_coding	1.87	1.26	2.36	2.77	1.12	3.1
FGA	ENSG00000171560	protein_coding	1.62	1.79	2.91	4.07	0.4	1.64
FLT1	ENSG00000102755	protein_coding	2.34	0.47	1.09	2.85	0.45	1.28
FOS	ENSG00000170345	protein_coding	3.05	13.1	39.92	27.26	1.28	34.77
FOSL1	ENSG00000175592	protein_coding	1.51	1.64	2.48	8.64	0.07	0.6
GADD45B	ENSG00000099860	protein_coding	2	53.39	106.71	2.56	15.26	39.07
GADD45G	ENSG00000130222	protein_coding	1.7	8.02	13.61	1.53	7.52	11.52
GATA2	ENSG00000179348	protein_coding	2.3	2.83	6.51	1.5	2.05	3.09
GDF15	ENSG00000130513	protein_coding	1.66	16.29	27.09	1.86	4.33	8.07
GRASP	ENSG00000161835	protein_coding	1.62	5.6	9.05	1.52	5.63	8.54
GS1-24F4.2	ENSG00000245857	lincRNA	1.8	7.84	14.13	1.52	10.41	15.8
HCG25	ENSG00000232940	antisense	8.48	0.03	0.23	9.6	0.03	0.26
HES1	ENSG00000114315	protein_coding	2.04	28.02	57.26	2.96	13.74	40.67
HES6	ENSG00000144485	protein_coding	3.71	0.24	0.9	3.12	0.49	1.53
HIST1H2AC	ENSG00000180573	protein_coding	3.51	0.38	1.33	2.81	0.41	1.16
HIST1H2BD	ENSG00000158373	protein_coding	3.68	0.17	0.61	4.66	0.16	0.73
HIST2H4A	ENSG00000183941	protein_coding	2.76	0.2	0.56	3.2	0.19	0.59
HMGB1P10	ENSG00000213707	pseudogene	2.02	5.69	11.52	2.01	5.74	11.53
HNRNPA3P1	ENSG00000226790	pseudogene	2.65	0.48	1.28	3.58	0.54	1.92
HOOK2	ENSG00000095066	protein_coding	1.57	2.24	3.53	1.78	1.14	2.03
HOXA9	ENSG00000078399	protein_coding	1.59	2.62	4.17	1.64	2.11	3.46
HOXB3	ENSG00000120093	protein_coding	2.1	0.16	0.33	1.63	0.19	0.31
HSD11B2	ENSG00000176387	protein_coding	1.93	48.58	93.53	1.8	48.32	86.92
HSPA1A	ENSG00000204389	protein_coding	5.47	18.73	102.46	10.47	9.79	102.41
HSPA1B	ENSG00000204388	protein_coding	6.24	23.86	148.91	9.66	15.4	148.76
HSPA5	ENSG00000044574	protein_coding	1.83	22.45	41.2	2.06	18.33	37.85
HSPA6	ENSG00000173110	protein_coding	3.71	0.22	0.82	15.36	0.06	0.85
IER2	ENSG00000160888	protein_coding	2.21	15.16	33.49	3.6	5.69	20.47
IGFBP1	ENSG00000146678	protein_coding	1.68	0.79	1.34	3.6	0.11	0.4
IL1R2	ENSG00000115590	protein_coding	1.78	0.2	0.35	2.57	0.11	0.29
INSIG1	ENSG00000186480	protein_coding	1.78	3.27	5.83	2.97	1.77	5.25
ITIH3	ENSG00000162267	protein_coding	7.42	0.01	0.08	5.28	0.02	0.11
ITPKC	ENSG00000086544	protein_coding	1.58	2.04	3.22	1.59	1.16	1.84
ITPRIP	ENSG00000148841	protein_coding	2.61	0.62	1.62	3.26	0.49	1.58
JMJD6	ENSG00000070495	protein_coding	1.51	1.61	2.43	1.62	0.86	1.4
JUN	ENSG00000177606	protein_coding	3.21	31.78	102.12	9.34	10.13	94.66
JUNB	ENSG00000171223	protein_coding	2	6.26	12.5	8.83	0.81	7.15
JUND	ENSG00000130522	protein_coding	1.58	163.81	258.86	2.24	66.65	149.39
KIAA1683	ENSG00000130518	protein_coding	1.83	0.89	1.64	2.04	0.53	1.09
KLF2	ENSG00000127528	protein_coding	1.77	15.9	28.17	2.91	10.04	29.21
KLF6	ENSG00000067082	protein_coding	1.53	33.66	51.51	2.88	13.37	38.53
KRT222_1	ENSG00000264058	protein_coding	2.22	0.08	0.19	1.56	0.13	0.2
KRT8P10	ENSG00000231203	pseudogene	1.67	4.53	7.57	3.44	1.22	4.19
LDLR	ENSG00000130164	protein_coding	1.7	2.62	4.45	2.95	0.99	2.91
LEAP2	ENSG00000164406	protein_coding	3.53	0.32	1.13	4.48	0.32	1.45
LRRC32	ENSG00000137507	protein_coding	1.91	3.7	7.05	1.58	2.03	3.22
LRRC37A2	ENSG00000238083	protein_coding	3.53	0.0099	0.03	2.56	0.03	0.08
MAL	ENSG00000172005	protein_coding	1.68	4.22	7.1	1.69	4.31	7.29
MFSD2A	ENSG00000168389	protein_coding	1.54	0.57	0.87	1.69	0.51	0.86
MIR10A	ENSG00000257178	sense_intronic	1.63	2.05	3.35	2.64	0.89	2.36
MIR24-2	ENSG00000267519	lincRNA	1.8	10.9	19.59	3.6	2.55	9.18
MKNK2	ENSG00000099875	protein_coding	1.82	6.38	11.63	1.58	5.31	8.4
MXD1	ENSG00000059728	protein_coding	1.6	0.54	0.87	2.36	0.45	1.07
NAA60_2	ENSG00000122390	protein_coding	2.44	0.03	0.08	1.92	0.04	0.08
NDRG1	ENSG00000104419	protein_coding	2.88	3.54	10.19	1.74	3.01	5.25
NEDD9	ENSG00000111859	protein_coding	1.51	0.37	0.56	1.69	0.4	0.68
NR1D1	ENSG00000126368	protein_coding	2.04	4.22	8.61	2.04	2.57	5.24
NRARP	ENSG00000198435	protein_coding	1.53	2.39	3.65	1.87	1.01	1.88
NTN5	ENSG00000142233	protein_coding	2.97	0.06	0.19	8.64	0.01	0.11
P2RY8	ENSG00000182162	protein_coding	1.83	0.38	0.69	2.32	0.09	0.21
P4HA1	ENSG00000122884	protein_coding	1.92	0.43	0.83	2.18	0.28	0.62
PCK1	ENSG00000124253	protein_coding	1.99	2.46	4.91	1.69	4.4	7.42
PDK3	ENSG00000067992	protein_coding	1.96	0.12	0.23	1.6	0.19	0.31
PDLIM3	ENSG00000154553	protein_coding	1.95	0.13	0.26	1.92	0.11	0.22
PELI1	ENSG00000197329	protein_coding	1.53	0.4	0.61	2.42	0.24	0.58
PET117	ENSG00000232838	protein_coding	2.07	0.6	1.25	1.75	0.61	1.07
PIK3R3	ENSG00000117461	protein_coding	1.61	0.46	0.74	2.11	0.32	0.67
PIM1	ENSG00000137193	protein_coding	1.52	5.69	8.66	2.33	2	4.65
PIM3	ENSG00000198355	protein_coding	1.71	38.6	65.89	1.58	22.78	36.1
PLAT	ENSG00000104368	protein_coding	4.63	1.86	8.61	3.62	2.58	9.35
PLAUR	ENSG00000011422	protein_coding	1.5	0.36	0.54	3.33	0.17	0.56
PPP1R15A	ENSG00000087074	protein_coding	1.53	11.04	16.88	2.21	7.42	16.4
PPP1R3C	ENSG00000119938	protein_coding	1.95	1.39	2.71	2.23	0.99	2.2
PPP2R5A	ENSG00000066027	protein_coding	1.61	0.72	1.15	1.5	0.61	0.92
PROSER2	ENSG00000148426	protein_coding	1.68	0.29	0.5	1.62	0.24	0.39
PVRL4	ENSG00000143217	protein_coding	1.92	0.49	0.95	1.56	0.46	0.71
RAB11FIP1	ENSG00000156675	protein_coding	2.33	1.53	3.56	1.63	1.16	1.9
RAB30	ENSG00000137502	protein_coding	1.94	0.07	0.13	1.93	0.1	0.19
RIPK4	ENSG00000183421	protein_coding	1.93	0.56	1.07	2.41	0.46	1.1
RN7SL32P	ENSG00000263941	misc_RNA	∞	0	2.23	∞	0	2.55
RND1	ENSG00000172602	protein_coding	3.71	0.2	0.74	3.36	0.07	0.23
RP11-138A9.2	ENSG00000273319	lincRNA	1.51	4.73	7.14	1.83	2.8	5.12
RP11-144G6.12	ENSG00000254929	processed_transcript	1.8	0.43	0.77	5.11	0.15	0.78
RP11-144L1.8	ENSG00000231434	pseudogene	1.72	3.36	5.77	2.28	2.17	4.95
RP11-193F5.1	ENSG00000258892	processed_transcript	2.19	0.02	0.05	5.76	0.00286	0.02
RP11-212P7.3	ENSG00000273184	processed_transcript	4.35	0.23	1	1.65	0.12	0.2
RP11-215A21.2	ENSG00000236058	pseudogene	2.34	9.99	23.4	1.79	11.67	20.88
RP11-236F9.2	ENSG00000228522	pseudogene	2.15	0.44	0.94	2.88	0.12	0.35
RP11-242O24.3	ENSG00000225750	lincRNA	7.42	0.06	0.43	∞	0	0.34
RP11-273B20.1	ENSG00000256967	antisense	2.6	0.76	1.97	3.04	0.42	1.26
RP11-297M9.1	ENSG00000260362	protein_coding	∞	0	0.06	∞	0	0.06
RP11-303E16.8	ENSG00000260643	processed_transcript	2.3	0.12	0.29	1.57	0.14	0.22
RP11-35J10.5	ENSG00000271758	lincRNA	1.65	0.05	0.09	1.77	0.03	0.05
RP11-428J1.5	ENSG00000272142	lincRNA	7.42	0.01	0.08	∞	0	0.04
RP11-468E2.2	ENSG00000259522	protein_coding	1.55	0.7	1.08	1.99	0.41	0.82
RP11-489E7.4	ENSG00000272256	antisense	∞	0	0.87	5.28	0.41	2.19
RP11-613D13.8	ENSG00000244953	lincRNA	2.85	0.81	2.3	2.62	0.47	1.24
RP11-697E2.6	ENSG00000261147	protein_coding	3.39	0.06	0.22	2.16	0.1	0.22
RP11-761B3.1	ENSG00000273269	protein_coding	1.87	0.11	0.21	2.74	0.12	0.34
RP11-779O18.3	ENSG00000253736	antisense	1.52	9.33	14.18	7.11	1.54	10.95
RP11-806H10.4	ENSG00000266970	lincRNA	4.77	0.06	0.31	2.28	0.09	0.2
RP4-663N10.1	ENSG00000228035	antisense	2.57	0.02	0.06	2.21	0.02	0.04
RP4-724E16.2	ENSG00000197670	antisense	1.62	0.4	0.65	1.88	0.18	0.33
RP5-899B16.2	ENSG00000225148	lincRNA	8.48	0.00684	0.06	5.28	0.01	0.07
RP6-145B8.3	ENSG00000225536	pseudogene	1.57	2.96	4.66	3.32	1	3.3
RPL13AP25	ENSG00000136149	pseudogene	2.23	11.18	24.97	2.01	7.93	15.91
RPL36A	ENSG00000241343	protein_coding	1.67	1.82	3.03	1.8	1.14	2.05
RRAD	ENSG00000166592	protein_coding	2.79	6.75	18.84	1.74	1.82	3.17
S100A8	ENSG00000143546	protein_coding	2.36	2.27	5.34	2.37	2.16	5.12
S100A9	ENSG00000163220	protein_coding	1.75	1.33	2.33	1.62	1.2	1.96
SDS	ENSG00000135094	protein_coding	2.3	0.08	0.18	2.64	0.03	0.09
SLC19A2	ENSG00000117479	protein_coding	1.54	2.06	3.16	2.39	1.23	2.94
SLC25A25	ENSG00000148339	protein_coding	1.89	2.09	3.95	1.61	1.17	1.88
SLC2A1	ENSG00000117394	protein_coding	3.66	1.08	3.96	2.05	0.59	1.21
SLC2A1-AS1	ENSG00000227533	lincRNA	5.38	0.08	0.45	1.52	0.32	0.49
SLC2A3	ENSG00000059804	protein_coding	3.23	1.76	5.68	5.86	0.56	3.29
SLC8A1-AS1	ENSG00000227028	antisense	1.53	0.02	0.02	1.57	0.02	0.03
SNAI1	ENSG00000124216	protein_coding	3.89	0.15	0.58	3.36	0.1	0.34
SOCS3	ENSG00000184557	protein_coding	3.27	8.75	28.58	4.89	2.72	13.32
SPAG5-AS1	ENSG00000227543	processed_transcript	1.79	0.53	0.96	2.68	0.72	1.93
TFPI	ENSG00000003436	protein_coding	1.62	0.05	0.09	1.59	0.08	0.13
TMPRSS2	ENSG00000184012	protein_coding	1.76	2.07	3.65	1.74	1.87	3.26
TNFRSF10D	ENSG00000173530	protein_coding	1.96	0.62	1.22	1.72	0.48	0.82
TPRXL	ENSG00000180438	protein_coding	1.5	0.09	0.14	1.89	0.04	0.07
TRAF3IP2	ENSG00000056972	protein_coding	1.58	0.11	0.18	1.97	0.12	0.23
TRIB1	ENSG00000173334	protein_coding	1.78	4.11	7.29	1.56	2.45	3.82
TUBG1P	ENSG00000237972	pseudogene	3.18	0.43	1.36	6.72	0.11	0.73
Z73979.1	ENSG00000197047	pseudogene	1.63	50.4	82.2	3.69	25.66	94.76
ZC3H12A	ENSG00000163874	protein_coding	2.39	2.15	5.14	2.69	0.75	2.01
ZFP36	ENSG00000128016	protein_coding	2.38	42.67	101.4	3.91	11.08	43.36
ZNF165	ENSG00000197279	protein_coding	1.7	0.81	1.38	2.04	0.41	0.84
ZNF664	ENSG00000179195	protein_coding	4.28	0.09	0.4	1.57	0.28	0.44
