# Supplementary material for: Reperfusion Activates AP-1 and Heat Shock Response in Donor Kidney Parenchyma after Warm Ischemia
Source: Hindawi journal article supplement (doi:10.1155/2018/5717913), 2018-08-16
Supplement: f1 [file 5717913.f1.zip › 5717913.f1/5717913.f3.xlsx]

## Sheet: Sheet1
Gene information			Kidney 1			Kidney 2
gene_name	ENSEMBL	gene_biotype	Weighted proportions fold change	Expression before (RPKM)	Expression after (RPKM)	Weighted proportions fold change	Expression before (RPKM)	Expression after (RPKM)
ABCA9	ENSG00000154258	protein_coding	-1.78	0.14	0.08	-1.73	0.09	0.05
AC003002.4	ENSG00000268133	protein_coding	-4.72	0.12	0.03	-6.88	0.14	0.02
AC003088.1	ENSG00000226965	lincRNA	-2.64	0.02	0.00753	-2.66	0.03	0.01
AC017101.10	ENSG00000227227	antisense	-3.46	0.09	0.03	-11.72	0.12	0.01
AC073321.3	ENSG00000224391	antisense	-inf	0.04	0	-inf	0.04	0
AC074117.10	ENSG00000234072	antisense	-1.51	1.02	0.68	-1.85	0.83	0.45
AC092159.2	ENSG00000233296	antisense	-4.34	0.17	0.04	-5.56	0.12	0.02
AC124861.1	ENSG00000227479	lincRNA	-1.94	0.19	0.1	-1.67	0.21	0.12
AC138035.2	ENSG00000238035	lincRNA	-1.69	0.75	0.44	-1.68	0.86	0.51
AGAP7	ENSG00000204169	protein_coding	-2.69	0.13	0.05	-16.67	0.11	0.00637
AIF1	ENSG00000204472	protein_coding	-1.74	3.8	2.18	-1.87	6.88	3.68
ALS2CR12	ENSG00000155749	protein_coding	-2.19	0.11	0.05	-1.56	0.13	0.08
AP4B1	ENSG00000134262	protein_coding	-2.47	0.47	0.19	-1.77	0.55	0.31
APOBEC3C	ENSG00000244509	protein_coding	-3.58	0.44	0.12	-4.17	0.56	0.14
APOD	ENSG00000189058	protein_coding	-1.69	1.78	1.06	-2.2	0.86	0.39
ATAD5	ENSG00000176208	protein_coding	-1.65	0.5	0.3	-2.26	0.66	0.29
AVIL	ENSG00000135407	protein_coding	-2.23	0.35	0.16	-1.85	0.38	0.21
BDNF-AS	ENSG00000245573	antisense	-1.95	0.05	0.03	-1.69	0.11	0.07
BMS1P1	ENSG00000204177	pseudogene	-3.54	0.37	0.1	-2.15	0.59	0.28
BOC	ENSG00000144857	protein_coding	-1.93	0.33	0.17	-1.7	0.09	0.06
C11orf73	ENSG00000149196	protein_coding	-1.69	0.32	0.19	-2.25	0.4	0.18
C12orf42	ENSG00000179088	protein_coding	-2.83	0.01	0.00358	-5.99	0.01	0.00218
C16orf93	ENSG00000196118	protein_coding	-3.54	0.41	0.12	-2.92	0.39	0.13
C21orf91	ENSG00000154642	protein_coding	-4.01	0.08	0.02	-1.88	0.13	0.07
C6orf183	ENSG00000243587	polymorphic_pseudogene	-1.7	0.06	0.04	-1.55	0.1	0.07
C8orf44-SGK3	ENSG00000270024	protein_coding	-1.52	0.14	0.09	-1.67	0.21	0.12
C9orf147	ENSG00000230185	protein_coding	-1.85	0.27	0.14	-2.02	0.25	0.12
CAV1	ENSG00000105974	protein_coding	-1.54	0.3	0.2	-1.72	0.17	0.1
CCDC114	ENSG00000105479	protein_coding	-3.77	0.09	0.02	-3.65	0.08	0.02
CCSAP	ENSG00000154429	protein_coding	-1.96	0.49	0.25	-1.84	0.59	0.32
CD163L1	ENSG00000177675	protein_coding	-2.36	0.04	0.02	-1.58	0.05	0.03
CD3EAP	ENSG00000117877	protein_coding	-3.77	1.41	0.37	-1.87	1.39	0.74
CDRT4	ENSG00000239704	protein_coding	-1.73	0.42	0.24	-1.63	0.44	0.27
CHADL	ENSG00000100399	protein_coding	-5.89	0.32	0.05	-2.6	0.32	0.12
CR1	ENSG00000203710	protein_coding	-2.04	0.04	0.02	-1.74	0.08	0.05
CSRP2BP	ENSG00000149474	protein_coding	-1.5	0.32	0.21	-1.61	0.38	0.24
CTB-111H14.1	ENSG00000243797	sense_overlapping	-1.96	0.08	0.04	-1.59	0.05	0.03
CTC-487M23.8	ENSG00000272869	protein_coding	-1.58	0.69	0.44	-1.57	0.63	0.4
CTC-498J12.3	ENSG00000248664	antisense	-2.67	0.41	0.15	-4.48	0.27	0.06
CTD-2007H13.3	ENSG00000248489	lincRNA	-1.63	0.11	0.07	-1.71	0.09	0.05
CTD-2516F10.2	ENSG00000251364	antisense	-1.71	0.1	0.06	-1.52	0.14	0.09
CTD-3148I10.9	ENSG00000269469	protein_coding	-2.55	0.17	0.07	-5.42	0.16	0.03
CYP2F1	ENSG00000197446	protein_coding	-4.01	0.18	0.04	-2.08	0.25	0.12
DCHS1	ENSG00000166341	protein_coding	-1.71	0.5	0.29	-1.67	0.27	0.16
DYX1C1	ENSG00000256061	protein_coding	-2.53	0.14	0.06	-2	0.15	0.08
F13A1	ENSG00000124491	protein_coding	-1.65	0.11	0.07	-1.54	0.16	0.11
FOXD2	ENSG00000186564	protein_coding	-1.83	1.03	0.56	-2.02	1.04	0.51
GLI3	ENSG00000106571	protein_coding	-1.79	0.03	0.02	-1.66	0.04	0.02
GPR176	ENSG00000166073	protein_coding	-1.59	0.08	0.05	-1.52	0.07	0.05
GTF2IP2	ENSG00000226930	pseudogene	-2.04	0.08	0.04	-2.27	0.08	0.03
GUCY1B3	ENSG00000061918	protein_coding	-2.05	0.15	0.07	-1.94	0.16	0.08
HBA1	ENSG00000206172	protein_coding	-9.12	5.01	0.55	-3.65	15.87	4.35
HBA2	ENSG00000188536	protein_coding	-5.84	21.91	3.75	-2.98	27.22	9.15
HBB	ENSG00000244734	protein_coding	-inf	1.63	0	-2.84	3.36	1.18
HELQ	ENSG00000163312	protein_coding	-1.58	0.3	0.19	-1.56	0.35	0.22
INCENP	ENSG00000149503	protein_coding	-1.56	0.31	0.2	-1.67	0.36	0.22
ITGB3_1	ENSG00000259207	protein_coding	-2.15	0.41	0.19	-2.99	0.46	0.15
KIF28P	ENSG00000223519	pseudogene	-2.03	0.07	0.03	-1.96	0.16	0.08
KITLG	ENSG00000049130	protein_coding	-1.63	0.3	0.18	-1.64	0.32	0.2
KRBOX4	ENSG00000147121	protein_coding	-1.51	0.25	0.17	-1.6	0.26	0.16
LINC00298	ENSG00000235665	lincRNA	-12.26	0.00532	0.000434	-inf	0.00165	0
LINC00886	ENSG00000240875	lincRNA	-2.1	0.13	0.06	-1.74	0.13	0.07
LINC01004	ENSG00000228393	antisense	-1.79	0.84	0.47	-1.58	0.93	0.59
MFSD2B	ENSG00000205639	protein_coding	-1.73	0.12	0.07	-1.64	0.11	0.07
MIR1302-9	ENSG00000227518	antisense	-inf	0.18	0	-inf	0.36	0
MIR145	ENSG00000269936	lincRNA	-1.85	3.37	1.82	-2.62	4.79	1.83
MLK7-AS1	ENSG00000238133	antisense	-3.02	0.02	0.00668	-27.08	0.03	0.00122
MSMP	ENSG00000215183	protein_coding	-4.24	0.36	0.09	-8.33	0.32	0.04
MST4	ENSG00000134602	protein_coding	-5.66	0.03	0.00586	-7.29	0.04	0.00536
MYLK3	ENSG00000140795	protein_coding	-2.45	0.07	0.03	-1.98	0.07	0.04
NPR2	ENSG00000159899	protein_coding	-1.8	0.33	0.18	-1.96	0.27	0.14
NSFP1	ENSG00000260075	pseudogene	-2.64	0.05	0.02	-1.68	0.06	0.04
OLFML2A	ENSG00000185585	protein_coding	-1.63	0.55	0.34	-1.61	0.31	0.19
PAMR1	ENSG00000149090	protein_coding	-2.2	0.07	0.03	-2.55	0.03	0.01
PAQR3	ENSG00000163291	protein_coding	-1.67	0.17	0.1	-1.51	0.17	0.11
POM121L10P	ENSG00000224124	pseudogene	-2.4	0.29	0.12	-1.56	0.57	0.36
PRAMENP	ENSG00000197549	pseudogene	-3.23	0.07	0.02	-2.02	0.09	0.04
PRICKLE1	ENSG00000139174	protein_coding	-1.51	0.31	0.2	-1.52	0.17	0.11
PROX2	ENSG00000119608	protein_coding	-5.34	0.23	0.04	-2.92	0.19	0.07
PTHLH	ENSG00000087494	protein_coding	-2.64	0.14	0.05	-2.73	0.21	0.08
RASL11B	ENSG00000128045	protein_coding	-1.64	1.95	1.19	-1.93	3.59	1.86
RP1-78O14.1	ENSG00000257894	lincRNA	-1.57	0.2	0.13	-1.51	0.2	0.13
RP11-110G21.1	ENSG00000228801	antisense	-3.77	0.09	0.02	-1.73	0.18	0.1
RP11-111F5.5	ENSG00000227449	pseudogene	-3.03	0.11	0.04	-1.6	0.12	0.08
RP11-1217F2.1	ENSG00000235095	pseudogene	-6.6	0.43	0.07	-inf	0.25	0
RP11-134O21.1	ENSG00000254319	lincRNA	-2.08	0.05	0.02	-1.9	0.07	0.04
RP11-142L4.2	ENSG00000236792	pseudogene	-inf	1.31	0	-inf	1.66	0
RP11-162A12.2	ENSG00000264278	protein_coding	-2.66	0.33	0.12	-1.79	0.32	0.18
RP11-216L13.17	ENSG00000272896	protein_coding	-1.52	1.58	1.04	-1.79	2.36	1.32
RP11-21L19.1	ENSG00000254418	antisense	-1.72	0.68	0.4	-2.04	0.66	0.33
RP11-296E7.1	ENSG00000218418	pseudogene	-2.83	1.03	0.37	-4.43	1.27	0.29
RP11-302B13.5	ENSG00000272822	protein_coding	-1.6	0.37	0.23	-2.68	0.39	0.15
RP11-337C18.8	ENSG00000237188	antisense	-1.62	0.48	0.3	-1.64	0.58	0.35
RP11-340I6.8	ENSG00000226581	lincRNA	-2.36	0.21	0.09	-2.02	0.27	0.13
RP11-360L9.4	ENSG00000253133	antisense	-1.61	0.19	0.12	-2.29	0.22	0.1
RP11-388M20.2	ENSG00000261385	antisense	-3.77	7.85	2.08	-6.25	9.91	1.59
RP11-458D21.5	ENSG00000255168	protein_coding	-1.77	1.92	1.09	-3.1	4.65	1.5
RP11-506H20.1	ENSG00000251307	antisense	-3.5	0.12	0.04	-2.58	0.16	0.06
RP11-523L20.2	ENSG00000261231	lincRNA	-1.95	0.02	0.01	-2.05	0.04	0.02
RP11-525J21.1	ENSG00000249892	lincRNA	-inf	0.02	0	-inf	0.03	0
RP11-529H20.6	ENSG00000261372	sense_overlapping	-3.3	0.35	0.11	-2	0.63	0.31
RP11-596D21.1	ENSG00000257831	antisense	-3.84	0.15	0.04	-2	0.12	0.06
RP11-631M6.2	ENSG00000250461	pseudogene	-1.89	8.22	4.36	-2.23	5.93	2.66
RP11-64D24.4	ENSG00000256195	antisense	-8.49	0.07	0.00795	-inf	0.03	0
RP11-659G9.3	ENSG00000254698	sense_overlapping	-inf	0.00772	0	-inf	0.00779	0
RP11-752G15.9	ENSG00000259315	pseudogene	-4.48	0.21	0.05	-5.56	0.18	0.03
RP11-763B22.9	ENSG00000231448	pseudogene	-3.77	0.05	0.01	-5.21	0.04	0.0075
RP11-77H9.8	ENSG00000260979	lincRNA	-3.65	1.05	0.29	-1.94	3.26	1.68
RP11-795F19.5	ENSG00000267127	protein_coding	-1.59	0.12	0.07	-3.03	0.16	0.05
RP11-802E16.3	ENSG00000255031	antisense	-1.73	2.12	1.23	-4.28	1.8	0.42
RP3-449O17.1	ENSG00000244627	pseudogene	-4.72	0.02	0.00489	-inf	0.01	0
RP4-673M15.1	ENSG00000272768	antisense	-2.83	1.52	0.54	-5.73	1.12	0.2
RP5-1126H10.2	ENSG00000272084	3prime_overlapping_ncrna	-7.23	0.98	0.14	-1.89	1.25	0.66
RP5-837J1.2	ENSG00000224113	sense_overlapping	-1.8	2.5	1.39	-1.61	2.05	1.27
RPP38	ENSG00000152464	protein_coding	-1.96	0.27	0.14	-2.35	0.33	0.14
RPS2P4	ENSG00000196183	pseudogene	-3.54	2.45	0.69	-4.69	1.48	0.32
RWDD2B	ENSG00000156253	protein_coding	-1.78	0.5	0.28	-1.62	0.66	0.4
SCN9A	ENSG00000169432	protein_coding	-2.28	0.02	0.01	-1.55	0.09	0.06
SHISA2	ENSG00000180730	protein_coding	-2.24	0.86	0.38	-2.34	0.82	0.35
SLC35G2	ENSG00000168917	protein_coding	-2.05	0.29	0.14	-1.69	0.27	0.16
SLC39A8	ENSG00000138821	protein_coding	-1.79	0.07	0.04	-2.05	0.05	0.02
SOST	ENSG00000167941	protein_coding	-1.66	2.33	1.4	-1.57	1.98	1.26
SSPN	ENSG00000123096	protein_coding	-1.79	0.05	0.03	-2.78	0.04	0.01
STEAP4	ENSG00000127954	protein_coding	-2.14	0.44	0.21	-2.2	0.18	0.08
TMEM216	ENSG00000187049	protein_coding	-1.89	0.81	0.43	-3.04	0.72	0.24
TMEM47	ENSG00000147027	protein_coding	-2.09	0.35	0.17	-1.5	0.38	0.25
VANGL1	ENSG00000173218	protein_coding	-1.86	0.19	0.1	-1.96	0.24	0.12
VILL	ENSG00000136059	protein_coding	-3.02	0.12	0.04	-2.6	0.19	0.07
WASH4P	ENSG00000234769	protein_coding	-1.71	2.4	1.4	-2.8	1.39	0.5
ZNF366	ENSG00000178175	protein_coding	-1.91	0.17	0.09	-1.62	0.1	0.06
ZNF501	ENSG00000186446	protein_coding	-inf	0.17	0	-4.69	0.18	0.04
ZNF503-AS1	ENSG00000226051	lincRNA	-2.59	0.03	0.01	-2.6	0.04	0.01
ZNF544	ENSG00000198131	protein_coding	-2.2	0.66	0.3	-1.57	0.66	0.42
ZNF66	ENSG00000160229	protein_coding	-3.34	0.17	0.05	-1.76	0.2	0.11
ZNF763_2	ENSG00000197054	protein_coding	-1.53	0.29	0.19	-1.66	0.71	0.43
ZNF764	ENSG00000169951	protein_coding	-4.09	0.4	0.1	-6.25	0.56	0.09
ZSWIM3	ENSG00000132801	protein_coding	-2.16	0.22	0.1	-1.94	0.19	0.1
